# Supplementary material for: Fluorescent Pseudomonas spp. from Suppressive and Non-Suppressive Soils Share Genomic and Functional Traits Relevant to Fusarium graminearum Disease Suppression
Source: Research Square preprint supplement (doi:10.21203/rs.3.rs-7214815/v1), 2025-09-10
Supplement: Supplementary file 1 [file 378fdfdcac7350cf1b4876ba.docx]

# Supplementary data: Fluorescent *Pseudomonas* spp. from Suppressive and Non-Suppressive Soils Share Genomic and Functional Traits Relevant to *Fusarium graminearum* Disease Suppression

Irena Todorović1,2, Danis Abrouk2, Martina Kyselková3, Rubén López-Mondéjar4,Vera Raičević5, Jelena Jovičić-Petrović5, Yvan Moënne-Loccoz2,6, Daniel Muller2

1Department of Hydroecology and Water Protection, Institute for Biological Research ¨Siniša Stanković¨, National Institute of the Republic of Serbia, University of Belgrade, Bulevar despota Stefana 142, Belgrade 11060, Serbia

2Université Claude Bernard Lyon 1, CNRS, INRAE, VetAgro Sup, UMR5557 Ecologie Microbienne, 43 bd du 11 novembre 1918, F-69622 Villeurbanne, France

3Laboratory of Environmental Microbiology, Institute of Microbiology of the Czech Academy of Sciences, Vídeňská 1083, 14220, Prague 4, Czech Republic

4CEBAS-CSIC, Department of Soil and Water Conservation, Campus Universitario de Espinardo, 30100, Murcia, Spain

5University of Belgrade, Faculty of Agriculture, Department of Microbial Ecology, Nemanjina 6, 11080 Zemun, Belgrade, Serbia

6Institut Universitaire de France (IUF), F-75005 Paris

# Supplementary tables

| **Table S1.** **Accession numbers of protein sequences corresponding to genes involved in biocontrol and plant-growth promotion, used as a query in genome screening.** | | |
| --- | --- | --- |
| Gene | Accession number | Reference species |
| *darA* | AAN18031.1 | *Pseudomonas chlororaphis* subsp. *aurantiaca* |
| *darB* | AAN18032.1 | *Pseudomonas chlororaphis* subsp. *aurantiaca* |
| *darC* | AAN18033.1 | *Pseudomonas chlororaphis* subsp. *aurantiaca* |
| *phzA* | AAC18900.1 | *Pseudomonas synxantha* 2-79 |
| *phzB* | AAC18901.1 | *Pseudomonas synxantha* 2-79 |
| *phzC* | AAC18902.1 | *Pseudomonas synxantha* 2-79 |
| *phzD* | AAC18903.1 | *Pseudomonas synxantha* 2-79 |
| *phzE* | AAC18904.1 | *Pseudomonas synxantha* 2-79 |
| *phzF* | AAC18905.1 | *Pseudomonas synxantha* 2-79 |
| *phzG* | AAC18906.1 | *Pseudomonas synxantha* 2-79 |
| *pchA* | PFLCHA0_c35300 | *Pseudomonas protegens* CHA0 |
| *pchB* | PFLCHA0AM_3611 | *Pseudomonas protegens* CHA0 |
| *pchC* | PFLCHA0_c35310 | *Pseudomonas protegens* CHA0 |
| *pchD* | PFLCHA0_c35370 | *Pseudomonas protegens* CHA0 |
| *pchE* | PFLCHA0_c35340 | *Pseudomonas protegens* CHA0 |
| *pchF* | PFLCHA0_c35330 | *Pseudomonas protegens* CHA0 |
| *phlA* | PSF113_2462 | *Pseudomonas ogarae* F113 |
| *phlB* | PSF113_2460 | *Pseudomonas ogarae* F113 |
| *phlC* | PSF113_2461 | *Pseudomonas ogarae* F113 |
| *phlD* | PSF113_2459 | *Pseudomonas ogarae* F113 |
| *prnA* | PFLCHA0_c36450 | *Pseudomonas protegens* CHA0 |
| *prnB* | PFLCHA0_c36460 | *Pseudomonas protegens* CHA0 |
| *prnC* | PFLCHA0_c36470 | *Pseudomonas protegens* CHA0 |
| *prnD* | PFLCHA0_c36480 | *Pseudomonas protegens* CHA0 |
| *hcnA* | PSF113_2367 | *Pseudomonas ogarae* F113 |
| *hcnB* | PSF113_2368 | *Pseudomonas ogarae* F113 |
| *hcnC* | PSF113_2369 | *Pseudomonas ogarae* F113 |
| *pltA* | PFLCHA0_c28450 | *Pseudomonas protegens* CHA0 |
| *pltB* | PFLCHA0_c28460 | *Pseudomonas protegens* CHA0 |
| *pltC* | PFLCHA0_c28470 | *Pseudomonas protegens* CHA0 |
| *pltD* | PFLCHA0_c28480 | *Pseudomonas protegens* CHA0 |
| *pltE* | PFLCHA0_c28490 | *Pseudomonas protegens* CHA0 |
| *pltF* | PFLCHA0_c28500 | *Pseudomonas protegens* CHA0 |
| *pltG* | PFLCHA0_c28510 | *Pseudomonas protegens* CHA0 |
| *pltL* | PFLCHA0_c28440 | *Pseudomonas protegens* CHA0 |
| *pltM* | VAV69124.1 | *Pseudomonas protegens* CHA0 |
| *pvdL* | VAV70531.1 | *Pseudomonas protegens* CHA0 |
| *pmsC* | CAA70528.1 | *Pseudomonas fluorescens* |
| *pmsE* | CAA70529.1 | *Pseudomonas fluorescens* |
| *pmsA* | CAA70530.1 | *Pseudomonas fluorescens* |
| *pmsB* | CAA70531.1 | *Pseudomonas fluorescens* |
| *fitD* | AGL84796.1 | *Pseudomonas protegens* CHA0 |
| *acdS* | PSF113_3500 | *Pseudomonas ogarae* F113 |
| *iacA* | ABY62757.1 | *Pseudomonas putida* |
| *iacB* | ABY62758.1 | *Pseudomonas putida* |
| *iacC* | ABY62759.1 | *Pseudomonas putida* |
| *iacD* | ABY62760.1 | *Pseudomonas putida* |
| *iacE* | ABY62761.1 | *Pseudomonas putida* |
| *iacF* | ABY62762.1 | *Pseudomonas putida* |
| *iacG* | ABY62763.1 | *Pseudomonas putida* |
| *iacH* | ABY62765.1 | *Pseudomonas putida* |
| *iacI* | ABY62766.1 | *Pseudomonas putida* |
| *acoA* | PFLCHA0_c22170 | *Pseudomonas protegens* CHA0 |
| *acoB* | PFLCHA0_c22180 | *Pseudomonas protegens* CHA0 |
| *acoC* | PFLCHA0_c22190 | *Pseudomonas protegens* CHA0 |
| *acoX* | PFLCHA0_c22160 | *Pseudomonas protegens* CHA0 |
| *bdhA* | JV497_v1_130113 | *Pseudomonas* sp. JV497 |
| *adh* | AAB58982.1 | *Pseudomonas putida* |
| *budA* | AAA25054.1 | *Raoultella terrigena* |
| *budB* | AAA25055.1 | *Raoultella terrigena* |
| *budC* | AAA25056.1 | *Raoultella terrigena* |
| *alsS* | AAA22222.1 | *Bacillus subtilis* |
| *alsD* | AAA22223.1 | *Bacillus subtilis* |
| *ilvB* | AAB81919.1 | *Lactococcus lactis* subsp. *lactis* NCDO 2118 |
| *ilvN* | AAB81920.1 | *Lactococcus lactis* subsp*. lactis* NCDO 2118 |
| *ydjL* | ALH44116.1 | *Bacillus subtilis* subsp. *subtilis* |
| *gcd* | NP_250980.1 | *Pseudomonas aeruginosa* PAO1 |
| *gad* | NP_250955.1 | *Pseudomonas aeruginosa* PAO1 |
| *nifH* | AAD03796.1 | *Trichodesmium erythraeum* IMS101 |
| *nifD* | AAD03797.1 | *Trichodesmium erythraeum* IMS101 |
| *nifK* | AAD03798.1 | *Trichodesmium erythraeum* IMS101 |
| *nirK* | PFLCHA0_c54550 | *Pseudomonas protegens* CHA0 |
| *nirS* | AAG34381.1 | *Pseudomonas fluorescens* |
| *aprA* | PFLCHA0_c32400 | *Pseudomonas protegens* CHA0 |
| *ipdC* | PP_2552 | *Pseudomonas alloputida* KT2440 |
| *ppdC* | WP_011158661.1 | *Rhodopseudomonas palustris* |
| *iaaM* | PSF113_5381 | *Pseudomonas ogarae* F113 |
| *iaaH* | JV395A_v1_10784 | *Pseudomonas* sp. JV395A |
| *efe* | BBI44544.1 | *Pseudomonas syringae* pv. *actinidiae* |

| **Table S2. Most probable numbers (MPN) of putative *Pseudomonas* from the rhizospheres of wheat grown in MI soils.** Data are expressed per root system, showing 95% confidence intervals [34]. | | | | |
| --- | --- | --- | --- | --- |
| Soil | Fg1 inoculation | MPN/root system | Confidence interval (95%) | |
| Lower | Higher |
| MI2 | Inoculated | 8.0 × 107 | 1.9 × 107 | 2.0 × 108 |
| MI3 | Inoculated | 4.5 × 107 | 1.3 × 107 | 1.1 × 108 |
| MI4 | Inoculated | 4.5 × 108 | 1.3 × 108 | 1.1 × 109 |
| MI5 | Inoculated | 2.7 × 107 | 8.9 × 106 | 7.0 × 107 |
| MI2 | Control | 1.7 × 108 | 5.8 × 107 | 5.0 × 108 |
| MI3 | Control | 8.0 × 109 | 1.9 × 109 | 2.0 × 1010 |
| MI4 | Control | 4.5 × 108 | 1.3 × 108 | 1.1 × 109 |
| MI5 | Control | 8.0 × 109 | 1.9 × 109 | 2.0 × 1010 |

| **Table S3. Taxonomic overview of the 29 whole-genome sequenced *Pseudomonas* strains from four Mionica soils.** The taxonomic identification was based on digital DNA-DNA hybridization (dDDH) withtheir closest relative species available at TYGS (Type Strain Genome Server),using genome-to-genome distance calculator website service from DSMZ [49, 50] and the similarity threshold of 70%. dDDH values of the 14 novel genomospecies and their closest described species (i.e., values < 70%) are indicated. | | | | | | | | | | | | | | | | | | | | | | | | |
| --- | --- | --- | --- | --- | --- | --- | --- | --- | --- | --- | --- | --- | --- | --- | --- | --- | --- | --- | --- | --- | --- | --- | --- | --- |
| Soil | Species name | *P. siliginis* SWRI31 T | | *P. glycinae* MS586 T | | *P. jessenii*  DSM 17150 T | | *P. pisciciola* P50 T | | *P. migulae* NBRC 103157 T | | *P. kielensis* MBT-1 T | | *P. umsongensis* DSM 16611 T | | *P. koreensis* LMG 21318 T | | *P. silesiensis*  A3 T | | *P. arsenicoxydans* CECT 7543 T | | *P. tensinigenes* ZA 5.3 T | | *P. neuropathica* P155 T |
| MI2 | *P. siliginis* IT-1P | * |  | |  | |  | |  | |  | |  | |  | |  | |  | |  | |  | |
| *Pseudomonas GN-1* IT-2P |  | 58.2 | |  | |  | |  | |  | |  | |  | |  | |  | |  | |  | |
| *Pseudomonas GN-2* IT-4P |  |  | | 54.6 | |  | |  | |  | |  | |  | |  | |  | |  | |  | |
| *Pseudomonas GN-3* IT-12P |  |  | |  | | 28.9 | |  | |  | |  | |  | |  | |  | |  | |  | |
| *P. jessenii* IT-43P |  |  | |  | |  | |  | |  | |  | |  | |  | |  | |  | |  | |
| *Pseudomonas GN-4* IT-44P |  |  | |  | |  | | 41.8 | |  | |  | |  | |  | |  | |  | |  | |
| *Pseudomonas GN-5* IT-74P |  |  | | 52.3 | |  | |  | |  | |  | |  | |  | |  | |  | |  | |
| MI3 | *Pseudomonas GN-6* IT-100P |  |  | |  | |  | | 50.4 | |  | |  | |  | |  | |  | |  | |  | |
| *Pseudomonas GN-6* IT-171P |  |  | |  | |  | | 50.9 | |  | |  | |  | |  | |  | |  | |  | |
| *Pseudomonas GN-7* IT-176P |  |  | |  | |  | |  | | 57.4 | |  | |  | |  | |  | |  | |  | |
| *P. serbica* IT-194P |  |  | |  | |  | |  | |  | |  | |  | |  | |  | |  | |  | |
| *P. chlororaphis* IT-196P |  |  | |  | |  | |  | |  | |  | |  | |  | |  | |  | |  | |
| *P. chlororaphis* IT-201P |  |  | |  | |  | |  | |  | |  | |  | |  | |  | |  | |  | |
| MI4 | *P. serboccidentalis* IT-215P |  |  | |  | |  | |  | |  | |  | |  | |  | |  | |  | |  | |
| *Pseudomonas GN-8* IT-218P |  |  | |  | |  | |  | |  | | 41.8 | |  | |  | |  | |  | |  | |
| *P. brassicacearum* IT-228P |  |  | |  | |  | |  | |  | |  | |  | |  | |  | |  | |  | |
| *Pseudomonas GN-9* IT-253P |  |  | |  | |  | |  | |  | |  | |  | | 33.2 | |  | |  | |  | |
| *Pseudomonas GN-2* IT-P258 |  |  | | 53.5 | |  | |  | |  | |  | |  | |  | |  | |  | |  | |
| *Pseudomonas GN-10* IT-260P |  |  | |  | |  | |  | |  | |  | | 43.4 | |  | |  | |  | |  | |
| *P. zeae* IT-265P |  |  | |  | |  | |  | |  | |  | |  | |  | |  | |  | |  | |
| *Pseudomonas GN-11* IT-291P |  |  | | 48.4 | |  | |  | |  | |  | |  | |  | |  | |  | |  | |
| *Pseudomonas GN-12* IT-294P |  |  | |  | |  | |  | |  | |  | |  | |  | | 60.9 | |  | |  | |
| MI5 | *P. chlororaphis* IT-324P |  |  | |  | |  | |  | |  | |  | |  | |  | |  | |  | |  | |
| *Pseudomonas GN-13* IT-347P |  |  | |  | |  | |  | |  | |  | |  | |  | |  | | 42.8 | |  | |
| *P. marginalis* IT-357P |  |  | |  | |  | |  | |  | |  | |  | |  | |  | |  | |  | |
| *P. serbica* IT-P366 |  |  | |  | |  | |  | |  | |  | |  | |  | |  | |  | |  | |
| *P. chlororaphis* IT-373P |  |  | |  | |  | |  | |  | |  | |  | |  | |  | |  | |  | |
| *P. serboccidentalis* IT-P374 |  |  | |  | |  | |  | |  | |  | |  | |  | |  | |  | |  | |
| *Pseudomonas GN-14* IT-395P |  |  | |  | |  | |  | |  | |  | |  | |  | |  | |  | | 47.3 | |
| * For *P. siliginis* IT-1P, dDDH value (GGDC formula 2) with the closest described type strain *P. siliginis* SWRI31T was 69.3%, but dDDH values for *P. siliginis* IT-1P and *P. siliginis* non-type strain OTU6BANIB1 (GenBank BioSample ID: SAMN29009911) was 80.2, showing that IT-1P and *P. siliginis* OTU6BANIB1 are within the same species. | | | | | | | | | | | | | | | | | | | | | | | | |

| **Table S4. Number of putative biosynthetic gene clusters (BGCs) and number of BGCs with completion 1 or 1*, in the *Pseudomonas* strains, found using the antiSMASH [71] within the MicroScope platform.** | | | | | |
| --- | --- | --- | --- | --- | --- |
| Soil | Species name from TYGS | Bacterial isolate |  | Number of putative BGCs | Number of BGCs with completion 1 or 1* |
| MI2 | *Pseudomonas siliginis* | IT-1P |  | 8 | 0 |
| *Pseudomonas GN-1* | IT-2P |  | 11 | 1 |
| *Pseudomonas GN-2* | IT-4P |  | 8 | 0 |
| *Pseudomonas GN-3* | IT-12P |  | 10 | 1 |
| *P. jessenii* | IT-43P |  | 8 | 0 |
| *Pseudomonas GN-4* | IT-44P |  | 8 | 0 |
| *Pseudomonas GN-5* | IT-74P |  | 10 | 0 |
| MI3 | *Pseudomonas GN-6* | IT-100P |  | 8 | 0 |
| *Pseudomonas GN-6* | IT-171P |  | 9 | 0 |
| *Pseudomonas GN-7* | IT-176P |  | 6 | 0 |
| *P. serbica* | IT-194P |  | 12 | 0 |
| *P. chlororaphis* | IT-196P |  | 15 | 3 |
| *P. chlororaphis* | IT-201P |  | 14 | 3 |
| MI4 | *P. serboccidentalis* | IT-215P |  | 9 | 0 |
| *Pseudomonas GN-8* | IT-218P |  | 11 | 0 |
| *P. brassicacearum* | IT-228P |  | 13 | 1 |
| *Pseudomonas GN-9* | IT-253P |  | 7 | 1 |
| *Pseudomonas GN-2* | IT-P258 |  | 8 | 0 |
| *Pseudomonas GN-10* | IT-260P |  | 11 | 1 |
| *P. zeae* | IT-265P |  | 11 | 1 |
| *Pseudomonas GN-11* | IT-291P |  | 9 | 0 |
| *Pseudomonas GN-12* | IT-294P |  | 10 | 1 |
| MI5 | *P. chlororaphis* | IT-324P |  | 16 | 2 |
| *Pseudomonas GN-13* | IT-347P |  | 12 | 1 |
| *P. marginalis* | IT-357P |  | 14 | 2 |
| *P. serbica* | IT-P366 |  | 11 | 0 |
| *P. chlororaphis* | IT-373P |  | 15 | 3 |
| *P. serboccidentalis* | IT-P374 |  | 11 | 0 |
| *Pseudomonas GN-14* | IT-395P |  | 11 | 1 |
| * When two or more genes in a single MIBiG (The Minimum Information about a Biosynthetic Gene cluster database) curated region were similar, the same gene in MicroScope database can hit on these MIBiG genes. When this happens, the completion can be higher than 1 (represented by 1*). | | | | | |

# Supplementary figures

**
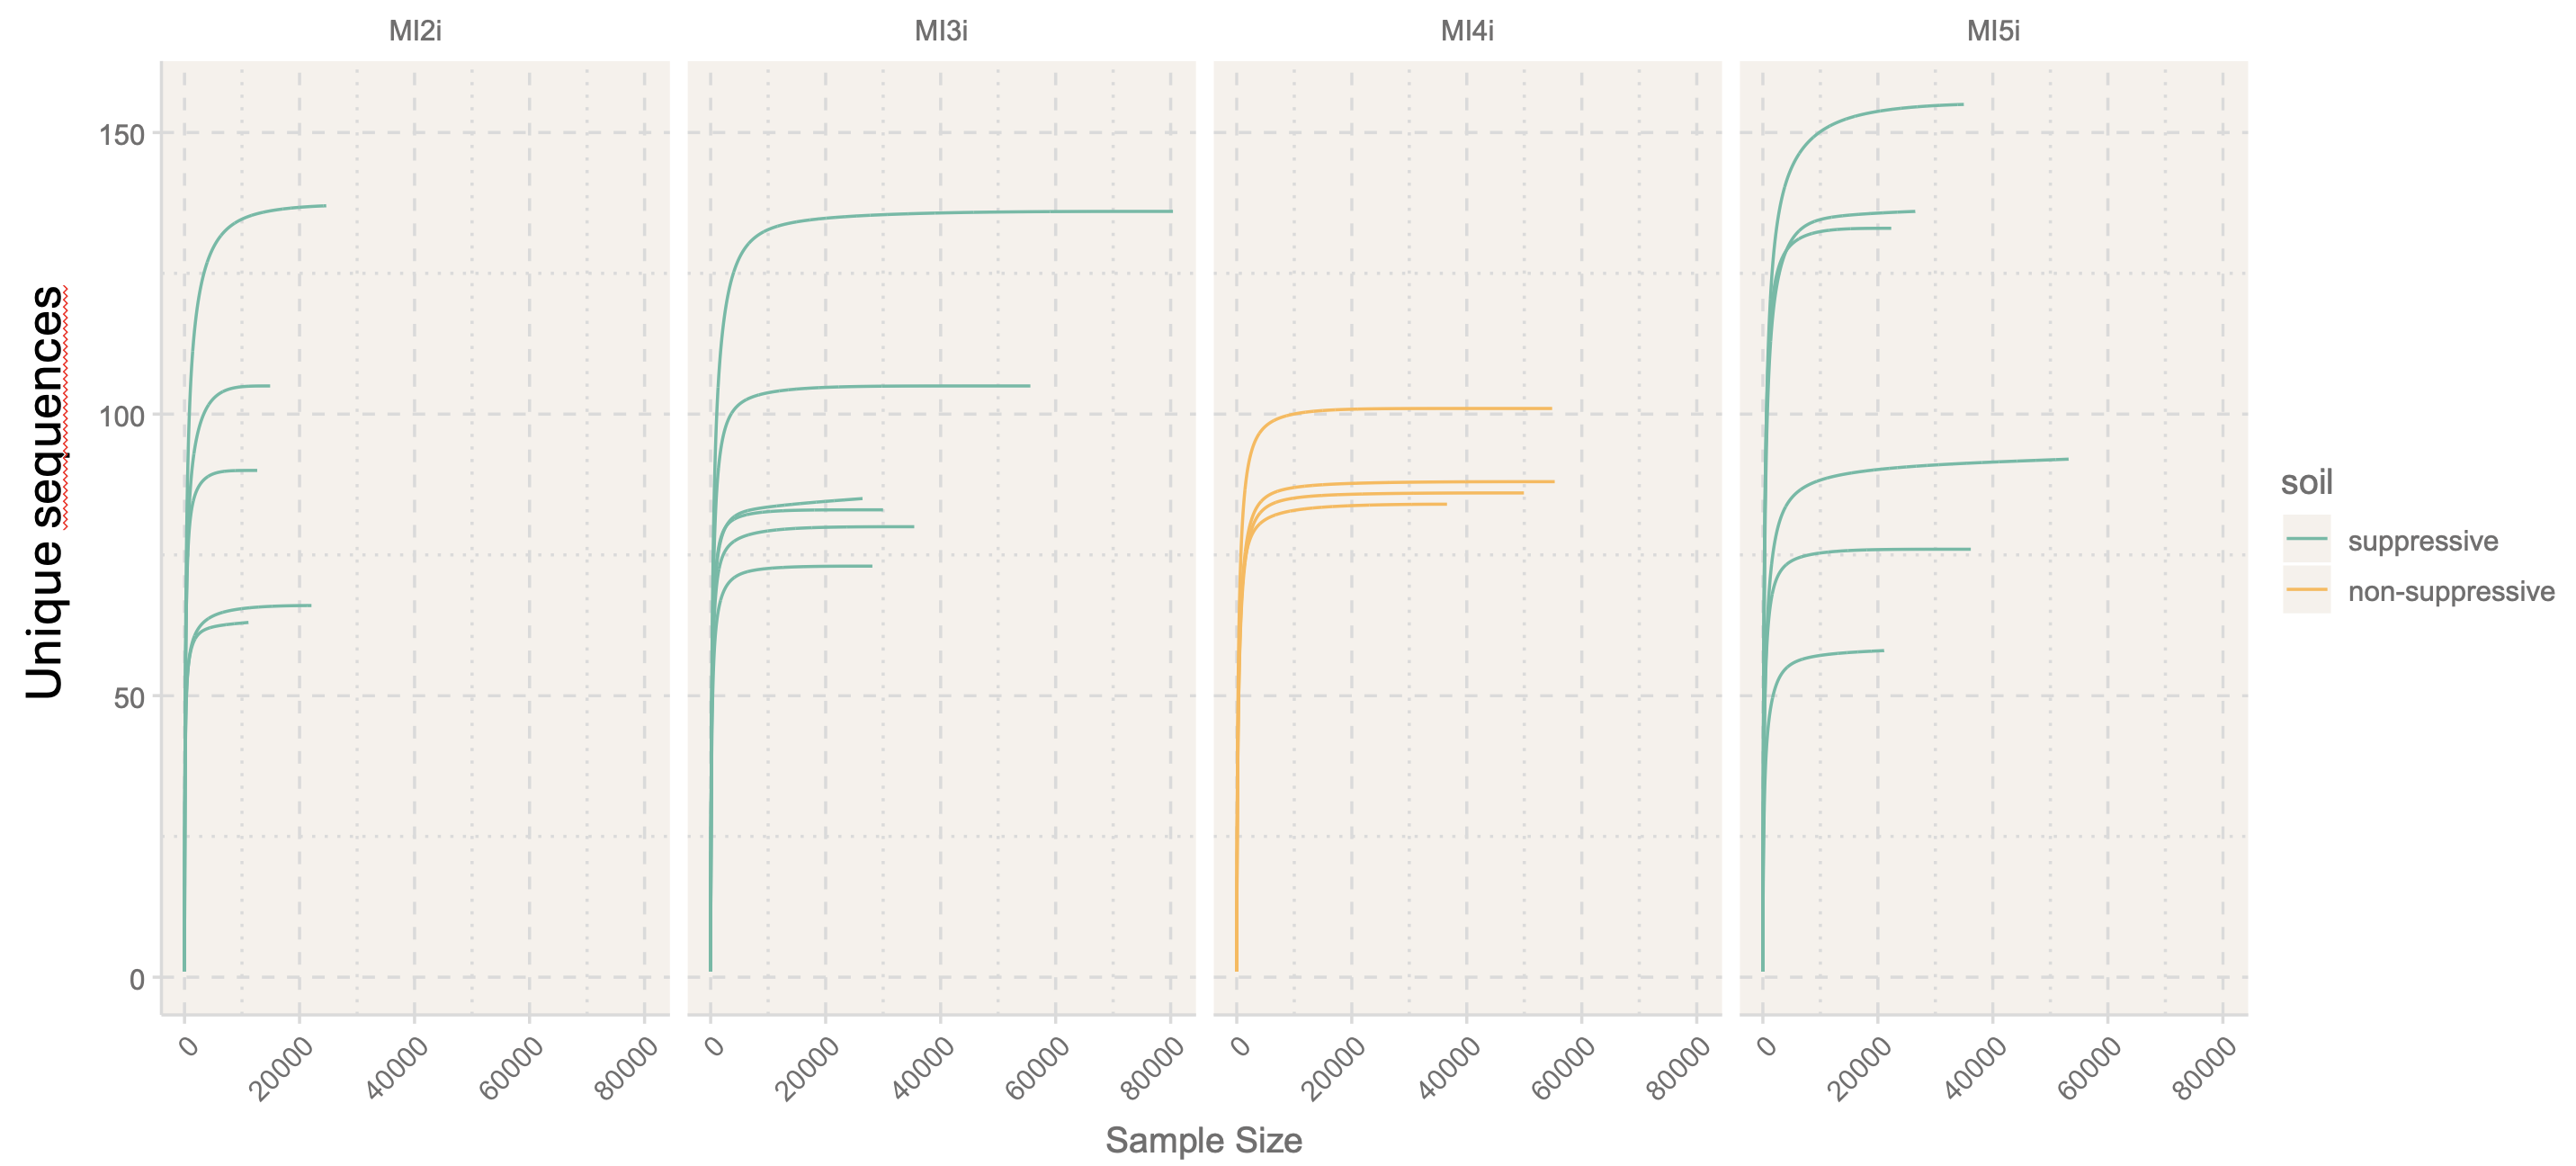
**

**Figure S1. Rarefaction curves with the estimated species richness of each replicate for *rpoD* metabarcoding of MI2, MI3, MI4 and MI5 soils**. One MI2 and two MI4 replicates (with not enough reads) were discarded~~.~~


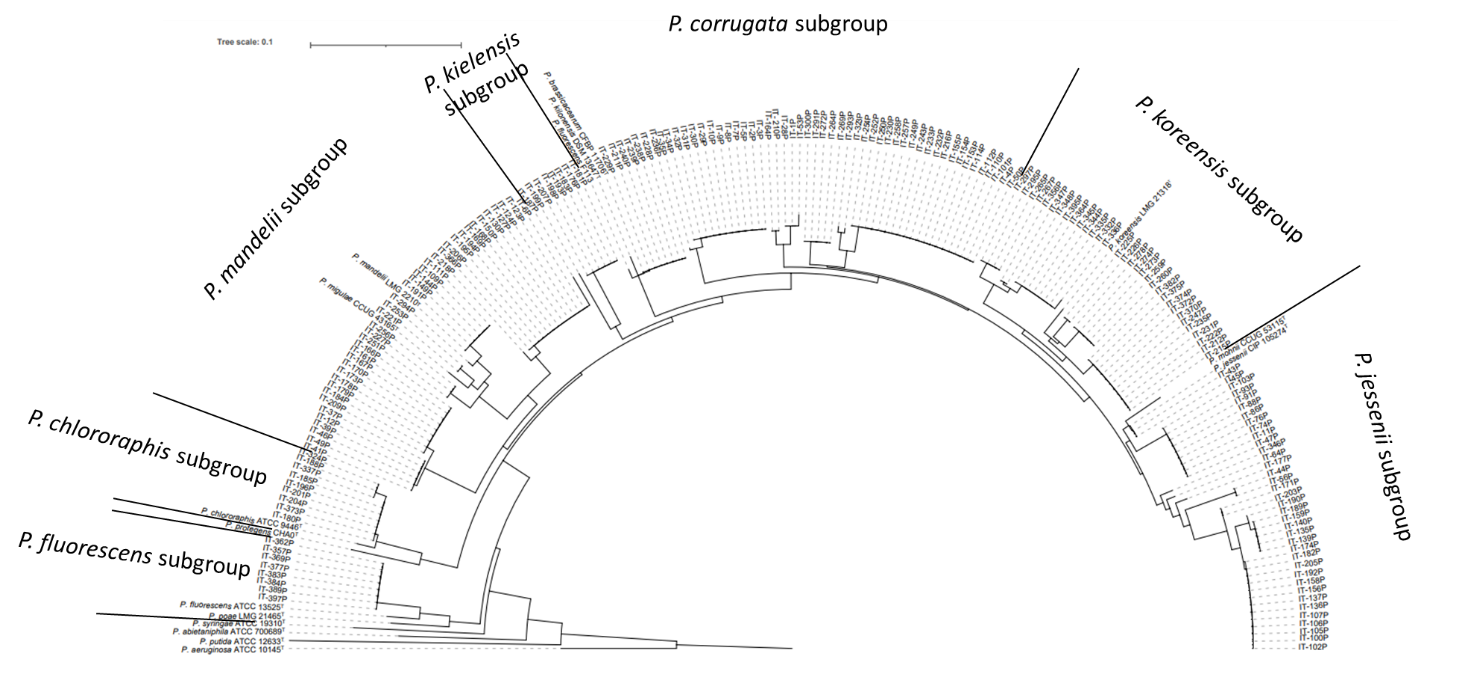


**Figure S2. Phylogenetic tree of 185 *Pseudomonas* isolates characterized based on their *rpoD* gene sequence, and belonging to the *P. fluorescens* group.** The phylogenetic tree includes 14 *Pseudomonas* type strains [16] and *P. aeruginosa* ATCC 10145T, used for tree rooting. Other *Pseudomonas* groups such as the *P. syringae*, *P. putida* and *P. lutea* groups are also represented. Analysis was done using the SeaView multiplatform [46], the sequences were aligned with Muscle5 v.3.8.31 [42], the phylogenetic tree was constructed with Distance method and 1000 bootstraps and visualized using iTol [47].


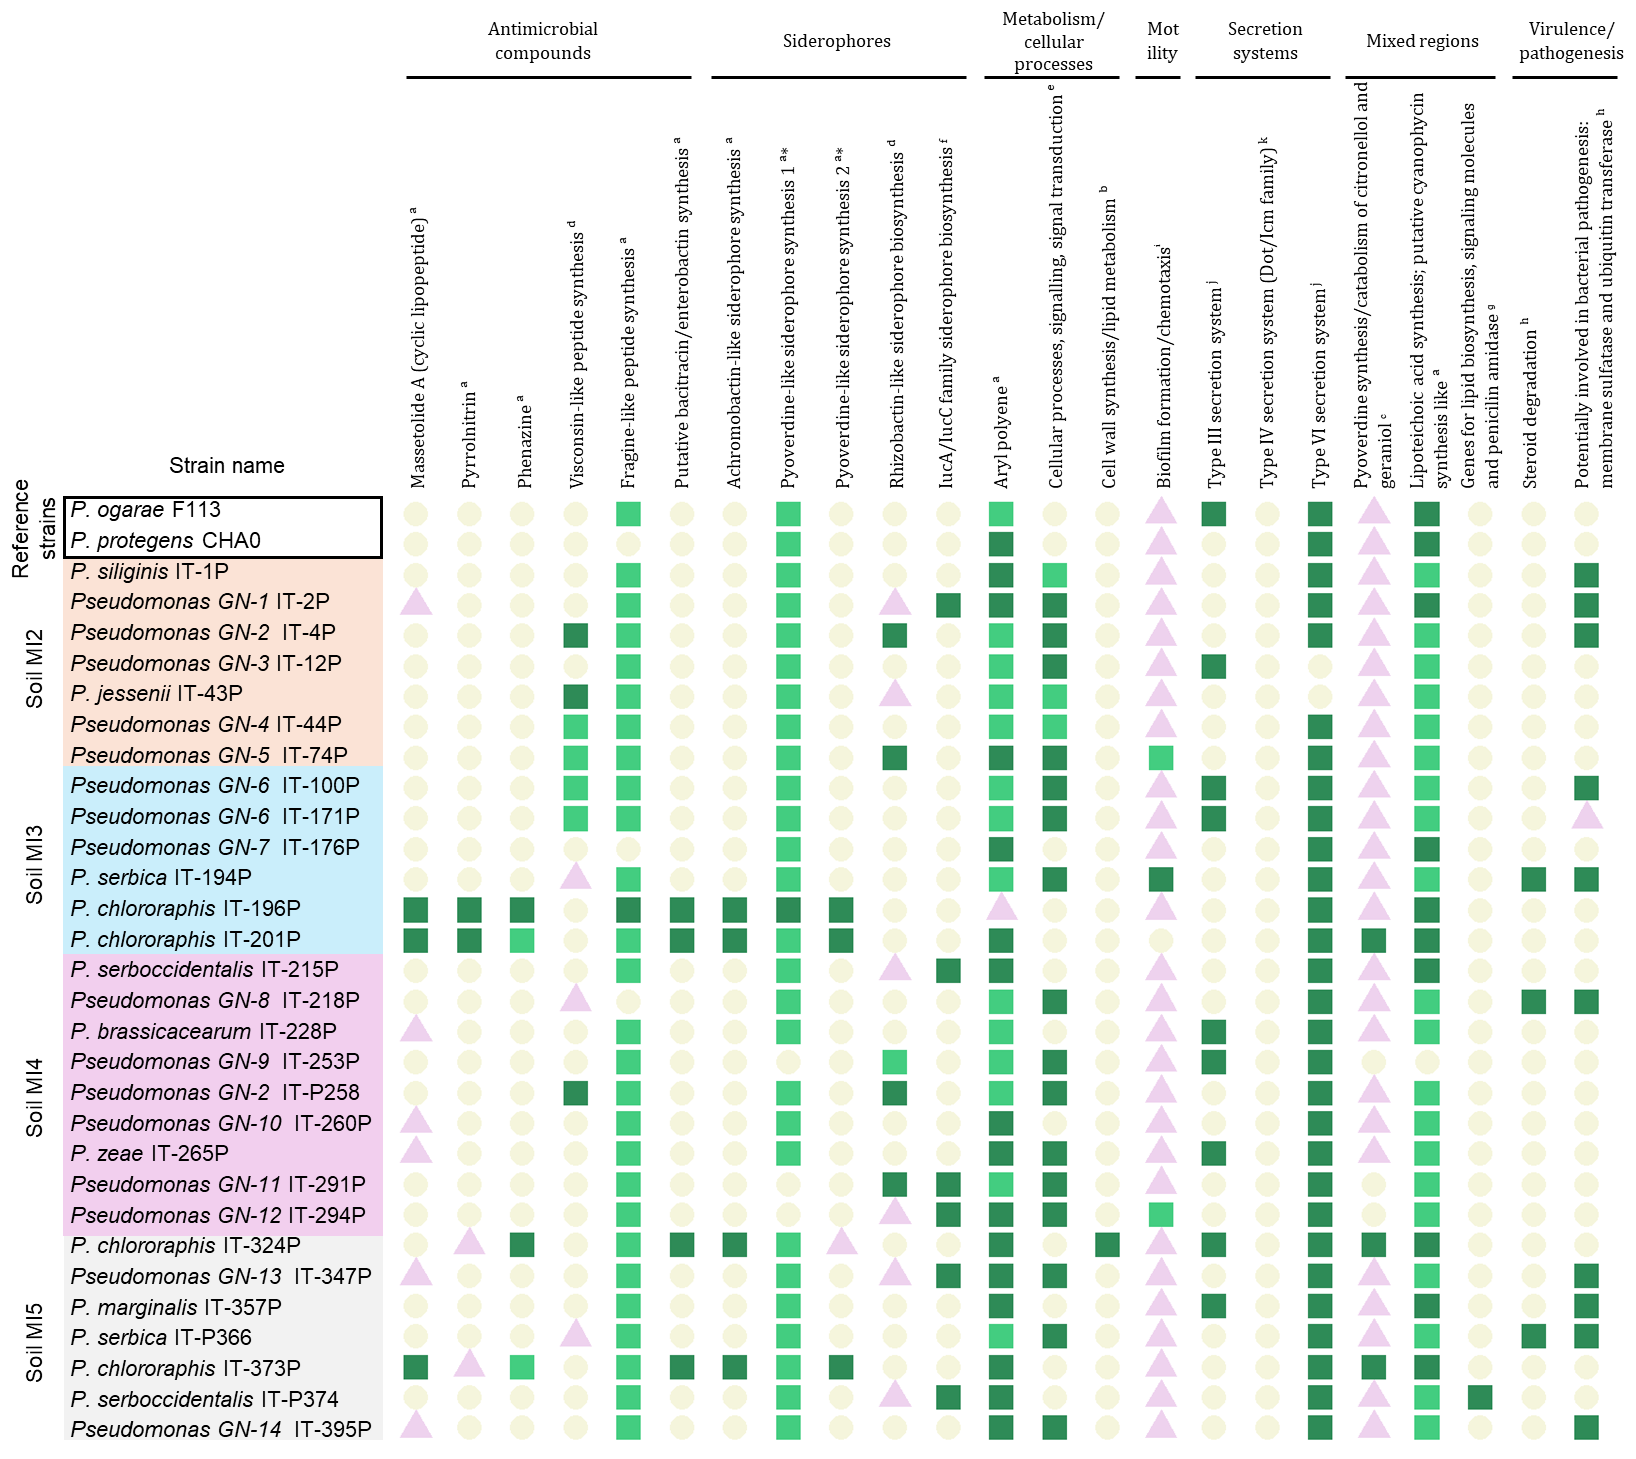


* Pyoverdine-like siderophore synthesis region 1 is present in *P. chlororaphis* IT-196P from position 4223142 to 4276158 and pyoverdine-like synthesis region 2 from position 6268542 to 6339315.

**Figure S3. Putative biosynthetic gene clusters (BGCs) identified using antiSMASH (Blin et al., 2019) and manually curated.** Dark green square shows the presence of BGC, pale green square shows the presence of BGC, but with different gene synteny, purple triangle shows the presence of partial BGC and pale circle shows the absence of BGC. a BGC compared to the one present in IT-196P, b compared to IT-324P, c compared to IT-373P, d compared to IT-P258, e compared to IT-P4, f compared to IT-215P, g compared to IT-P374, h compared to IT-P366, i compared to IT-194P, j compared to *P. ogarae* F113 and k as described in Costa et al. (2021). Annotation was completed on April 18th, 2023.


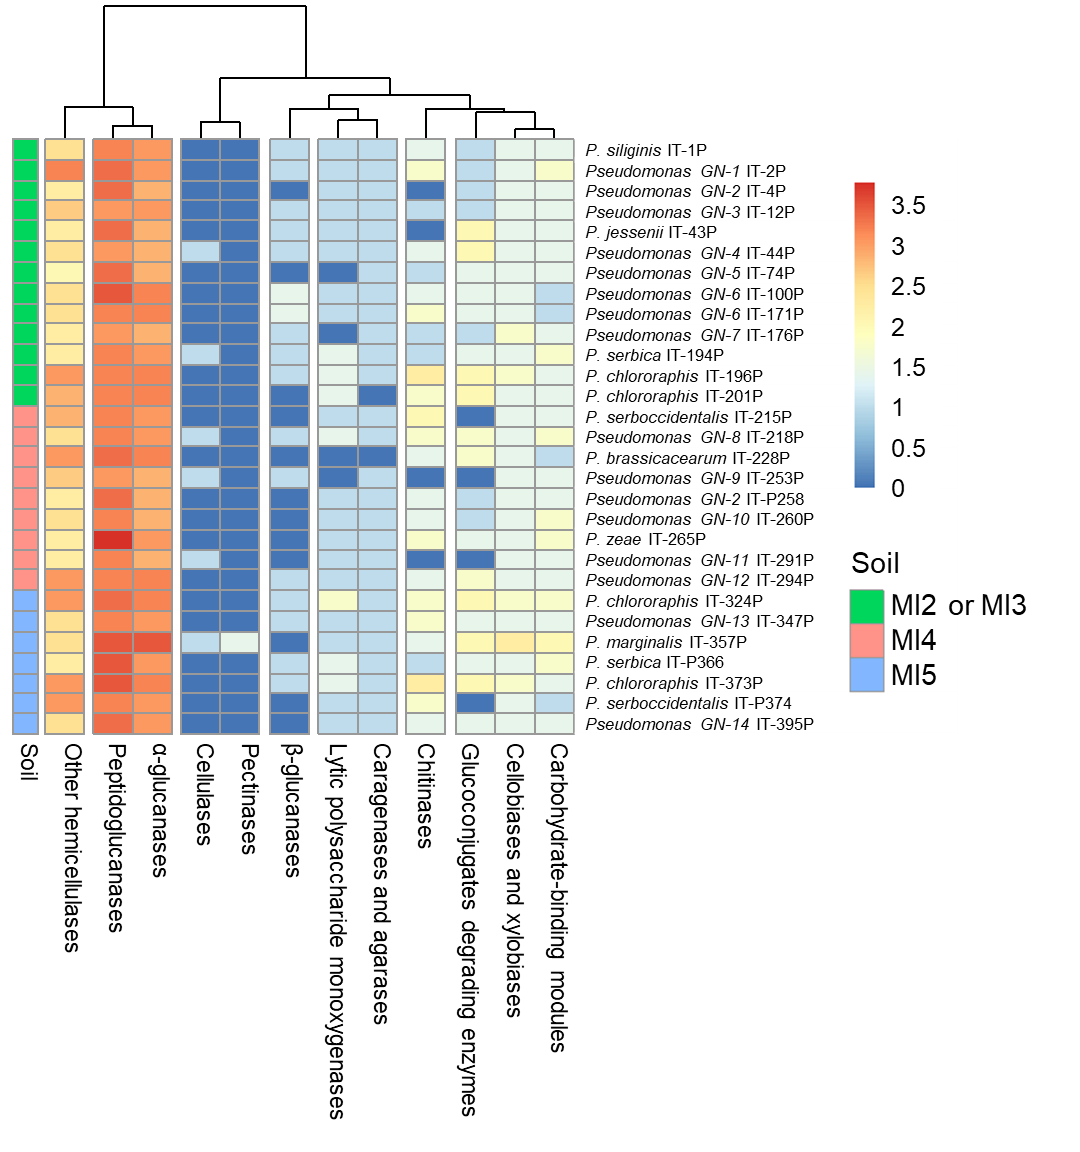


**Figure S4. Heatmap showing the abundance of CAZyme genes annotated for each function found in the genomes of *Pseudomonas* strains.** Legend shows transformed counts.


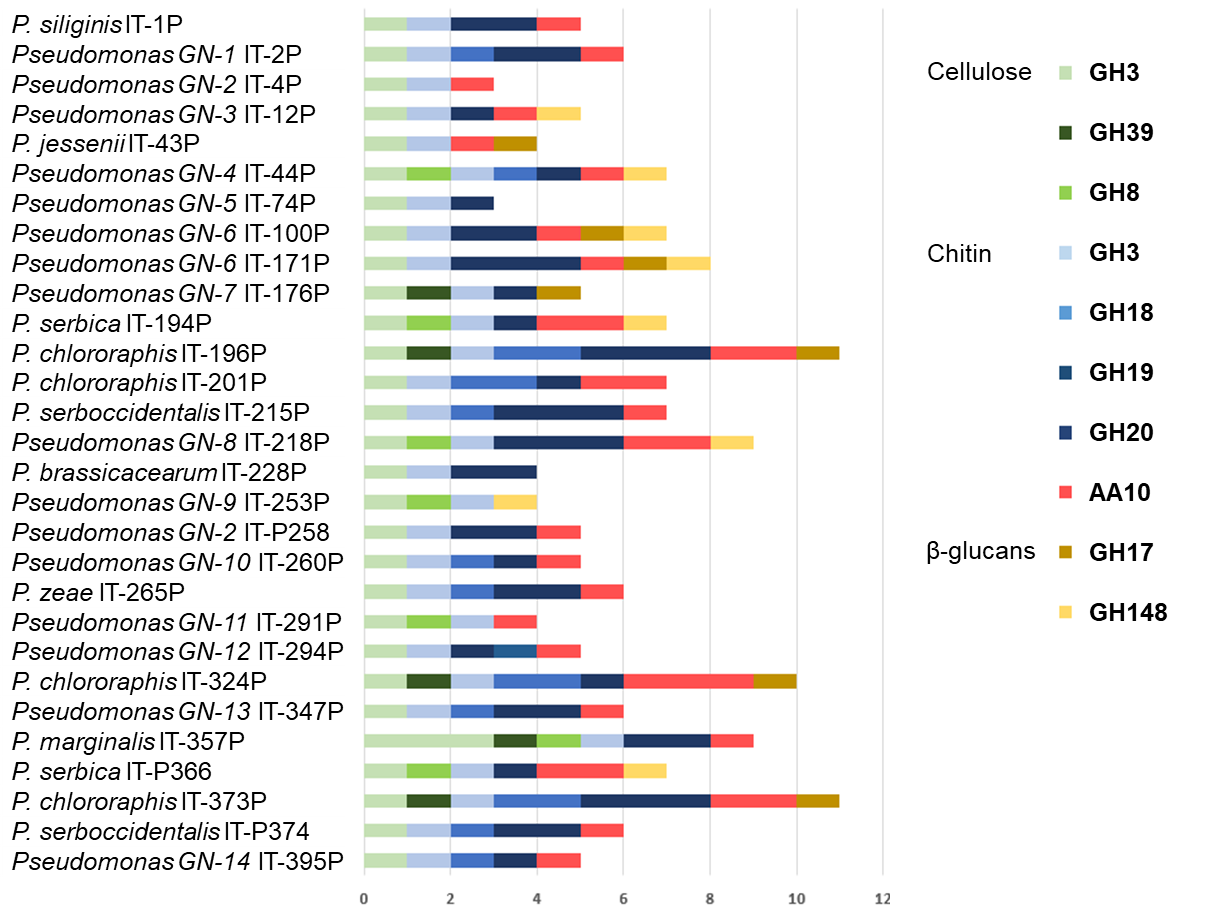


**Figure S5. Abundance of *Pseudomonas* genes corresponding to CAZyme families potentially targeting cell wall components in fungi and oomycetes (cellulose, chitin and β-glucans).**
